## RESEARCH ARTICLE

# Efficacy and safety of aripiprazole or bupropion augmentation and switching in patients with treatment-resistant depression or major depressive disorder: A systematic review and meta-analysis of randomized controlled trials

Mengjia Ji<sup>1</sup>, Junfei Feng<sup>2</sup>, Guirong Liu<sup>1\*</sup>

**1** Department of Traditional Chinese Medicine, Shandong University of Traditional Chinese Medicine, Jinan, Shandong Province, China, **2** Department of Traditional Chinese Medicine, Shandong Wendeng Osteopath Hospital, Weihai, Shandong Province, China

\* [455409573@qq.com](mailto:455409573@qq.com)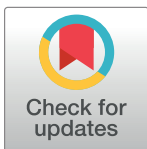**OPEN ACCESS**

**Citation:** Ji M, Feng J, Liu G (2024) Efficacy and safety of aripiprazole or bupropion augmentation and switching in patients with treatment-resistant depression or major depressive disorder: A systematic review and meta-analysis of randomized controlled trials. *PLoS ONE* 19(4): e0299020. <https://doi.org/10.1371/journal.pone.0299020>

**Editor:** Sairah Hafeez Kamran, Lahore College for Women University, PAKISTAN

**Received:** October 23, 2023

**Accepted:** February 3, 2024

**Published:** April 26, 2024

**Copyright:** © 2024 Ji et al. This is an open access article distributed under the terms of the [Creative Commons Attribution License](https://creativecommons.org/licenses/by/4.0/), which permits unrestricted use, distribution, and reproduction in any medium, provided the original author and source are credited.

**Data Availability Statement:** All relevant data are within the manuscript and its [Supporting information](#) files.

**Funding:** The author(s) received no specific funding for this work.

**Competing interests:** The authors have declared that no competing interests exist.

## Abstract

### Objectives

To report the first and largest systematic review and meta-analysis of randomized controlled trials (RCT) to evaluate the efficacy and safety of aripiprazole or bupropion augmentation and switching in patients with treatment-resistant depression (TRD) or major depressive disorder (MDD).

### Methods

We conducted a systematic literature retrieval via PubMed, Embase, Web of Science, and Cochrane until April 2023 for RCT, which evaluated the efficacy and safety of aripiprazole or bupropion augmentation and switching for patients with TRD or MDD. Outcomes measured were changes in the Montgomery-Asberg Depression Rating Scale (MADRS), response and remission rate, and serious adverse events.

### Results

Five RCTs, including 4480 patients, were included for meta-analysis. Among them, two RCTs were rated as "high risk" in three aspects (allocation concealment, blinding of participants and personnel and blinding of outcome assessment) because of the non-blind method, and the quality evaluation of the remaining works of literature was "low risk". Augmentation treatment with Aripiprazole (A-ARI) was associated with a significant higher response rate compared with augmentation treatment with bupropion (A-BUP) (RR: 1.15; 95% CI: 1.05, 1.25; P = 0.0007; I<sup>2</sup> = 23%). Besides, A-ARI had a significant higher remission rate compared with switching to bupropion (S-BUP) (RR: 1.22; 95% CI: 1.00, 1.49; P = 0.05; I<sup>2</sup> = 59%) and A-BUP had a significant higher remission rate compared with S-BUP (RR:

1.20; 95% CI: 1.06, 1.36;  $P = 0.0004$ ;  $I^2 = 0\%$ ). In addition, there was no significant difference in remission rate (RR: 1.05; 95% CI: 0.94, 1.17;  $P = 0.42$ ;  $I^2 = 33\%$ ), improvement of MADRS (WMD: -2.07; 95% CI: -5.84, 1.70;  $P = 0.28$ ;  $I^2 = 70\%$ ) between A-ARI and A-BUP. No significant difference was observed in adverse events and serious adverse events among the three treatment strategies.

## Conclusions

A-ARI may be a better comprehensive antidepressant treatment strategy than A-BUP or S-BUP for patients with TRD or MDD. More large-scale, multi-center, double-blind RCTs are needed to further evaluate the efficacy and safety of aripiprazole or bupropion augmentation and switching treatment strategies.

## Introduction

Major depressive disorder (MDD) is a chronic psychiatric disorder common in older adults characterized by failure to achieve remission despite appropriate treatment with first-line antidepressant medications. MDD could not only reduce quality of life and burden the healthcare system, it may also increase the risk of death [1,2]. The definition of Treatment-resistant depression (TRD) has not been agreed upon. The most popular saying at the moment is that TRD is defined as depression that remains unresolved despite two adequate trials of antidepressant drugs [3]. It has been reported that treatment failure of depression may be related to several risk factors such as impaired mental health, disability, and cognitive decline [4–8]. Significantly higher hospitalization rates and medical costs have been observed in patients with TRD and MDD patients compared with other patients [9]. The treatment strategies for TRD and MDD mainly include augmentation and switching. The former refers to adding another drug to the existing antidepressant treatment, while the latter refers to replacing the existing antidepressant medication with another drug from a different class [10].

The Sequenced Treatment Alternatives to Relieve Depression (STAR\*D) trial has revealed that augmenting treatment with bupropion or switching to bupropion was not inferior and may even be superior to other management strategies for patients with TRD or MDD [11]. In addition, in the Veterans Affairs Augmentation and Switching Treatments for Improving Depression Outcomes (VAST-D) trial, augmentation treatment with Aripiprazole (A-ARI) and augmentation treatment with bupropion (A-BUP) was more effective than switching to bupropion (S-BUP) [12], which is consistent with the findings of an open-label randomized controlled trial (RCT) involving elderly MDD patients aged 60 years or older published recently [10]. Nevertheless, which antidepressant treatment strategy has better efficacy and safety for patients with MDD has not yet reached a unified conclusion in all clinical trials. In 2017, Cheon et al. conducted a randomized, prospective, open-label clinical trial to directly compare the efficacy and safety between treatment with aripiprazole and augmentation treatment with bupropion, which found that augmentation treatment with aripiprazole and augmentation treatment with bupropion had similar efficacy and safety in patients with MDD [13].

Thus, we reported the first and largest systematic review and meta-analysis of RCTs to compare the efficacy and safety of the three most commonly used alternative treatment strategies (A-ARI, A-BUP, and S-BUP) for patients with TRD or MDD.

## Materials and methods

### Literature search

This meta-analysis was performed according to the PRISMA (Preferred Reporting Items for Systematic Reviews and Meta-Analysis) 2020 statement [14] and has been prospectively registered in the PROSPERO (CRD42023413661). We conducted a systematic literature search via PubMed, Embase, Web of Science, and Cochrane up to April 2023 for RCT, evaluating the efficacy and safety of aripiprazole or bupropion augmentation and switching for patients with TRD or MDD. We searched the literature through the following terms: "aripiprazole", "bupropion", and "depression". The detailed search strategy is as follows: ((((((Aripiprazol) OR (Abilify)) OR (OPC 14597)) OR (OPC-14597)) OR ("Aripiprazole"[Mesh])) AND (((((((Amfebutamone) OR (Wellbutrin)) OR (Zyban (Anti-Smoking))) OR (Zyban (Bupropion))) OR (Bupropion Hydrochloride)) OR (Quomen)) OR (Zyntabac)) OR ("Bupropion"[-Mesh])) AND ((((((Depressive Symptoms) OR (Depressive Symptom)) OR (Symptom, Depressive)) OR (Emotional Depression)) OR (Depression, Emotional)) OR ("Depression"[-Mesh])). The study presented a complete search strategy for all databases in [S1 Table](#). Furthermore, we manually screened the bibliography lists of all included RCTs. Two authors (Mengjia Ji and Junfei Feng) retrieved and assessed eligible articles independently. The study resolved any differences in literature retrieval through discussion and ultimately by Guirong Liu's decision.

### Inclusion and exclusion criteria

Articles were eligible when meeting the following standards: (1) study design was RCT; (2) studies were performed in patients with TRD or MDD; (3) studies evaluated the efficacy and safety of aripiprazole or bupropion augmentation and switching; (4) The study evaluated at least one efficacy (change of Montgomery-Asberg Depression Rating Scale (MADRS). The response rate and remission rate) or safety (adverse events and serious adverse events) and evaluated the outcome; (5) complete data to analyze risk ratio (RR) and weighted mean difference (WMD). We excluded study protocols, unpublished studies, non-original studies (including letters, comments, abstracts, corrections, and replies), non-RCT studies, studies without sufficient data, and reviews.

### Data abstraction

The study assigned two authors to conduct data abstraction (Mengjia Ji and Junfei Feng). Any differences were settled by another author (Guirong Liu). We abstracted following information from eligible RCTs: first author name, published year, research period, study region, study design, treatment allocation, sample size, follow-up time, age, gender, education, age at first onset of major depressive disorder (MDD), the Cumulative Illness Rating Scale–Geriatric (CIRS-G) score, Patient Health Questionnaire-9 (PHQ-9), Clinical Global Impression-Severity (CGI-S), change of MADRS, response rate, remission rate, adverse events and serious adverse events. If the article presented continuous data as median plus range or median plus interquartile range (IQR), we reanalyzed the mean  $\pm$  standard deviation (SD) via the methods reported by Wan et al. and Luo et al. [15,16]. If the research data is insufficient, corresponding authors were contacted for complete data.

### Quality assessment

The quality assessment of eligible RCTs was conducted following the Cochrane Handbook for Systematic Reviews of Interventions 5.1.0 based on seven terms: random sequence generation,

allocation concealment, blinding of participants and personnel, blinding of outcome assessment, incomplete outcome data, selective reporting, and other sources of bias [17]. Three evaluation outcomes were assigned to every study aspect: low, high, and unclear risk. Studies with more “low risk” bias evaluations were regarded as superior. Two authors (Mengjia Ji and Junfei Feng) assessed the quality of all included studies, and any disagreement was resolved through discussion and ultimately by Guirong Liu’s decision.

## Statistical analysis

Meta-analysis was conducted in Review Manager 5.4.1 edition. The WMD was applied for data synthesis for continuous data, and the RR was involved in synthesizing dichotomous data. Each metric was presented with 95% confidential intervals (CIs). The chi-squared ( $\chi^2$ ) test (Cochran’s *Q*) and inconsistency index ( $I^2$ ) were applied for the evaluation of the heterogeneity of each outcome [18].  $\chi^2$  *P* value less than 0.1 or  $I^2$  more than 50% were regarded as high heterogeneity. The random-effects model was applied to calculate the total WMD or RR for outcomes with significant heterogeneity ( $\chi^2$  *P* value less than 0.1 or  $I^2$  more than 50%). Or else the fixed-effects model was used. Besides, we conducted a sensitivity analysis to assess every RCT’s effect on the total WMD or RR for results with more than 2 included studies. Moreover, we evaluated the potential publication bias by producing funnel plots through Review Manager 5.4.1 edition for results with more than 3 included studies.

## Results

### Literature retrieval, study characteristics, and baseline

[Fig 1](#) shows the flowchart of the literature retrieval and selection process. A total of 1134 related studies in PubMed (*n* = 50), Embase (*n* = 935), Web of Science (*n* = 105), and Cochrane (*n* = 44) were identified via systematic literature search. After removing duplicate studies, 974 titles and abstracts were evaluated. Eventually, 5 RCTs, including 4480 patients (1479 in A-ARI, 1515 in A-BUP, and 1486 in S-BUP), were included for meta-analysis [10,12,13,19,20]. [Table 1](#) presents the characteristics of each eligible RCT. [Fig 2](#) indicates the details of the quality evaluation for all included RCTs.

The A-ARI and A-BUP groups were comparable in age (WMD: -0.37, *P* = 0.35), gender (RR: 1.02, *P* = 0.40), education (WMD: 0.46, *P* = 0.46), age at first onset of MDD (WMD: -1.45, *P* = 0.10), CIRS-G score (WMD: -0.04, *P* = 0.88), PHQ-9 (WMD: 0.12, *P* = 0.64) and CGI-S (WMD: 0.03, *P* = 0.46); the A-ARI and S-BUP groups were comparable in age (WMD: -0.54, *P* = 0.18), gender (RR: 0.97, *P* = 0.10), CIRS-G score (WMD: -0.24, *P* = 0.39) and CGI-S (WMD: 0.06, *P* = 0.12). However, the two groups were significantly different in age at first onset of MDD (WMD: -1.93, *P* = 0.03) and PHQ-9 (WMD: 0.62, *P* = 0.02); the A-BUP and S-BUP groups were comparable in age (WMD: -0.21, *P* = 0.60), age at first onset of MDD (WMD: -0.50, *P* = 0.57), CIRS-G score (WMD: -0.20, *P* = 0.45), PHQ-9 (WMD: 0.51, *P* = 0.05) and CGI-S (WMD: 0.04, *P* = 0.28) but significantly different in gender (RR: 0.96, *P* = 0.03) ([Table 2](#)).

### Remission

**A-ARI vs. A-BUP.** The study synthesized the remission results for A-ARI vs. A-BUP from 5 RCTs, including 3058 patients (1543 A-ARI versus 1515 A-BUP) [10,12,13,19,20]. The study found no significant difference between the A-ARI and A-BUP group for remission rate (RR: 1.05; 95% CI: 0.94, 1.17; *P* = 0.42) and no significant heterogeneity ( $I^2$  = 33%, *P* = 0.20) was observed ([Fig 3A](#)).

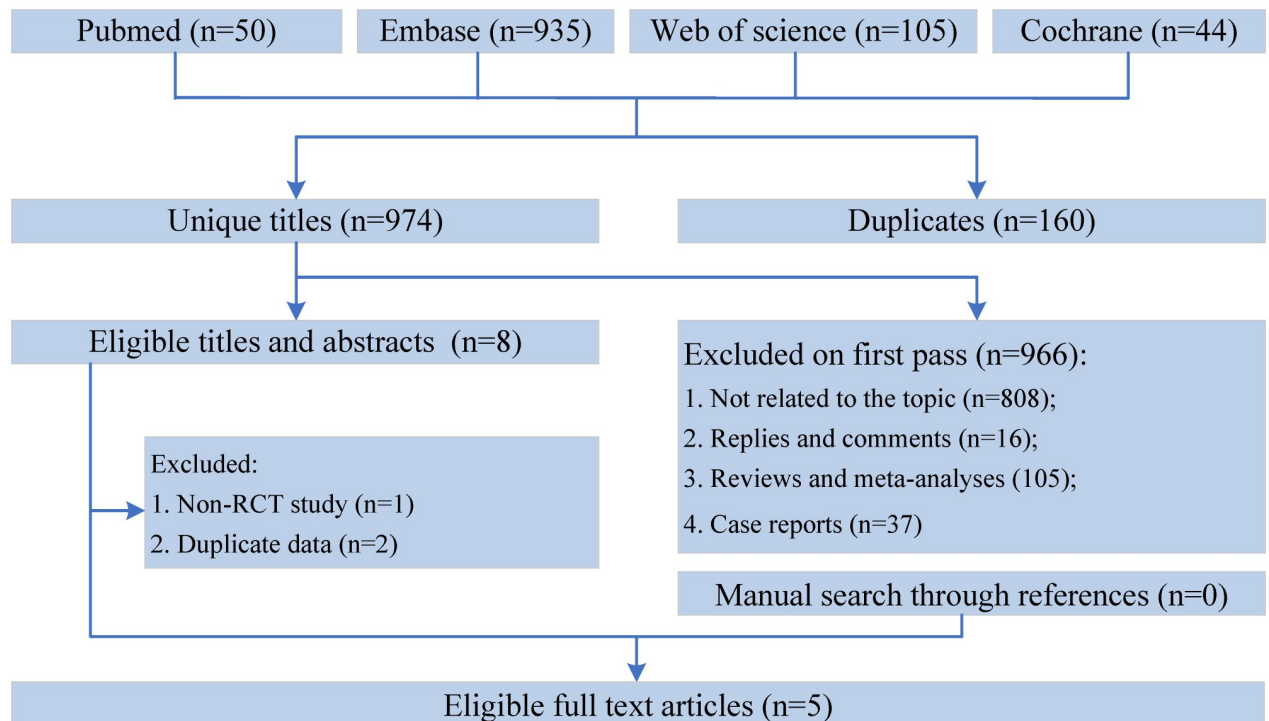

**Fig 1. Flowchart of the systematic search and selection process.**

<https://doi.org/10.1371/journal.pone.0299020.g001>

**A-ARI vs. S-BUP.** The study synthesized the remission results for A-ARI vs. S-BUP from 4 RCTs, including 2909 patients (1487 A-ARI versus 1422 S-BUP) [10,12,19,20]. Meta-analysis revealed a significantly higher remission rate in the A-ARI group (RR: 1.22; 95% CI: 1.00, 1.49;  $P = 0.05$ ) with a considerable heterogeneity ( $I^2 = 59\%$ ,  $P = 0.06$ ) (Fig 3B).

**A-BUP vs. S-BUP.** Data of remission for A-BUP vs. S-BUP were synthesized from 4 RCTs, including 2890 patients (1468 A-BUP versus 1422 S-BUP) [10,12,19,20]. Meta-analysis revealed a significantly higher remission rate in the A-BUP group (RR: 1.20; 95% CI: 1.06, 1.36;  $P = 0.0004$ ) with no significant heterogeneity ( $I^2 = 0\%$ ,  $P = 0.50$ ) (Fig 3C).

### Change of MADRS

There were only 2 RCTs that reported the data of change of MADRS between the A-ARI and A-BUP groups, including 461 patients (239 A-ARI versus 222 A-BUP) [10,13]. Evidence synthesis observed a similar change of MADRS in the two groups (WMD: -2.07; 95% CI: -5.84, 1.70;  $P = 0.28$ ) with a significant heterogeneity ( $I^2 = 70\%$ ,  $P = 0.07$ ) (Fig 4).

### Response

Two RCTs reported the response rate data in the A-ARI vs. A-BUP group, including 1114 patients (561 A-ARI versus 553 A-BUP) [12,13]. Pooled analysis revealed a significantly higher rate of response rate in the A-ARI group compared with the A-BUP groups (RR: 1.15; 95% CI: 1.05, 1.25;  $P = 0.0007$ ) without significant heterogeneity ( $I^2 = 23\%$ ,  $P = 0.25$ ) (Fig 5).

Table 1. Baseline characteristics of include studies and methodological assessment.

| Authors           | Study period | Country | Study design | Treatment allocation                                                                                                                                                                                                                                                                                                                                                                                                                                                                                                                                                                                    | Patients (n) | Follow-up | The dosage of the aripiprazole |                    | The dosage of the bupropion |                    | The background of participants                                                                                                                                                                                                                                                                                                             |
|-------------------|--------------|---------|--------------|---------------------------------------------------------------------------------------------------------------------------------------------------------------------------------------------------------------------------------------------------------------------------------------------------------------------------------------------------------------------------------------------------------------------------------------------------------------------------------------------------------------------------------------------------------------------------------------------------------|--------------|-----------|--------------------------------|--------------------|-----------------------------|--------------------|--------------------------------------------------------------------------------------------------------------------------------------------------------------------------------------------------------------------------------------------------------------------------------------------------------------------------------------------|
|                   |              |         |              |                                                                                                                                                                                                                                                                                                                                                                                                                                                                                                                                                                                                         |              |           | initial dose (mg/d)            | maximum dose(mg/d) | initial dose (mg/d)         | maximum dose(mg/d) |                                                                                                                                                                                                                                                                                                                                            |
| Cheon 2017 [13]   | 2016         | Korea   | RCT          | Aripiprazole (2.5–20 mg/d) (the aripiprazole group; n = 56) or bupropion (150–300 mg/d) for 6 weeks (the bupropion group; n = 47)                                                                                                                                                                                                                                                                                                                                                                                                                                                                       | 56/47/0      | 6 weeks   | 2.5                            | 20                 | 150                         | 300                | The age of 19 to 70 years, a Diagnostic and Statistical Manual of Mental Disorders, Fourth Edition, Text Revision diagnosis of MDD, and significant persistent depressive symptoms (total scores of $\geq 14$ on the HAM-D-17) despite at least 4 weeks of SSRI monotherapy at maximum recommended or tolerated doses                      |
| Lenze 2023 [10]   | 2017–2019    | USA     | RCT          | Patients were randomly assigned in a 1:1:1 ratio to augmentation of their existing medication with aripiprazole (starting at 2.5 mg per day and increasing to a maximum of 15 mg per day) (aripiprazole-augmentation group), augmentation of their existing medication with extended-release bupropion (starting at 150 mg per day, with a target of 300 mg per day and a maximum of 450 mg per day) (bupropion-augmentation group), or a taper of their current antidepressant and a switch to extended-release bupropion (same dose as the bupropion-augmentation group) (switch-to-bupropion group). | 211/206/202  | 1 year    | 2.5                            | 15                 | 150                         | 300~450            | Trial patients were 60 years of age or older and had treatment-resistant depression, defined as a lack of remission of major depression after two or more trial uses of antidepressants of adequate dose and duration within the current episode                                                                                           |
| Mohamed 2017 [12] | 2012–2015    | USA     | RCT          | Patients at 35 VA medical centers were randomized to 1 of 3 treatments: switch to another antidepressant, bupropion sustained release (switch group); augment current treatment with bupropion sustained release (augment-bupropion group); or augment current treatment with an antipsychotic, aripiprazole (augment-aripiprazole group).                                                                                                                                                                                                                                                              | 505/506/511  | 12 weeks  | 2                              | 5/10/15            | 150                         | 300~400            | Participants were VHA patients, 18 years or older, with an MDD diagnosis. Patients with a suboptimal response to a treatment course with a selective-serotonin reuptake inhibitor, serotonin and norepinephrine reuptake inhibitor, or mirtazapine that met or exceeded minimal standards for dose and duration of treatment were eligible |

(Continued)

Table 1. (Continued)

| Authors          | Study period | Country | Study design | Treatment allocation                                                                                                                                                                                                                                               | Patients (n) | Follow-up | The dosage of the aripiprazole |                    | The dosage of the bupropion |                    | The background of participants                                                                                                                                                                                                                                                                                                                                                                                                                                                                                                                                                                                                                |
|------------------|--------------|---------|--------------|--------------------------------------------------------------------------------------------------------------------------------------------------------------------------------------------------------------------------------------------------------------------|--------------|-----------|--------------------------------|--------------------|-----------------------------|--------------------|-----------------------------------------------------------------------------------------------------------------------------------------------------------------------------------------------------------------------------------------------------------------------------------------------------------------------------------------------------------------------------------------------------------------------------------------------------------------------------------------------------------------------------------------------------------------------------------------------------------------------------------------------|
|                  |              |         |              |                                                                                                                                                                                                                                                                    |              |           | initial dose (mg/d)            | maximum dose(mg/d) | initial dose (mg/d)         | maximum dose(mg/d) |                                                                                                                                                                                                                                                                                                                                                                                                                                                                                                                                                                                                                                               |
| Yoon 2018 [19]   | 2012–2016    | USA     | RCT          | Switch to another antidepressant, bupropion sustained release (switch group); augment current treatment with bupropion sustained release (augment-bupropion group); or augment current treatment with an antipsychotic, aripiprazole (augment-aripiprazole group). | 503/503/505  | 12 weeks  | 2                              | 5/10/15            | 150                         | 300~400            | Participants were 1,522 veterans, aged 18 years or older, who remained at least moderately depressed after meeting minimal standards of treatment for nonpsychotic MDD and were enrolled in 35 participating V A medical centers                                                                                                                                                                                                                                                                                                                                                                                                              |
| Zisook 2021 [20] | 2012–2017    | USA     | RCT          | Switch to another antidepressant, bupropion-SR (S-BUP); combine current treatment with bupropion-SR (C-BUP); or augment current treatment with an antipsychotic, aripiprazole (A-ARI).                                                                             | 204/253/268  | 36 weeks  | 2                              | 5/10/15            | 150                         | 300~400            | Participants were VHA outpatients, 18 years or older, with an MDD diagnosis, who were referred by their treating VA clinicians. Participants with a suboptimal response to a treatment course with a serotonin reuptake inhibitor, serotonin and norepinephrine reuptake inhibitor, or mirtazapine who met or exceeded the minimal standards for dose and duration of treatment were eligible (American Psychiatric Association [APA], 2010; Solvason & DeBattista, 2009). Suboptimal response was defined by a score of $\geq 16$ (severe depression) on the 16-item Quick Inventory of Depressive Symptomatology-Clinician Rated (QIDS-C16) |

A-ARI, augmenting with aripiprazole; A-BUP, augmenting with bupropion; S-BUP, switching to bupropion.

<https://doi.org/10.1371/journal.pone.0299020.t001>

## Adverse events

**A-ARI vs. A-BUP.** Results of adverse events for A-ARI vs A-BUP were synthesized from 3 RCTs, including 1635 patients (829 A-ARI versus 806 A-BUP) [12,13,20]. We found no significant difference between the A-ARI and A-BUP groups for adverse events (RR: 0.98; 95% CI: 0.90, 1.06;  $P = 0.55$ ), and a significant heterogeneity ( $I^2 = 52\%$ ,  $P = 0.13$ ) was observed (Fig 6A).

**A-ARI vs. S-BUP.** Adverse events data for A-ARI vs. S-BUP were synthesized from 2 RCTs, including 1488 patients (773 A-ARI versus 715 S-BUP) [12,20]. No significant difference was found between the A-ARI and S-BUP group for adverse events (RR: 1.00; 95% CI:

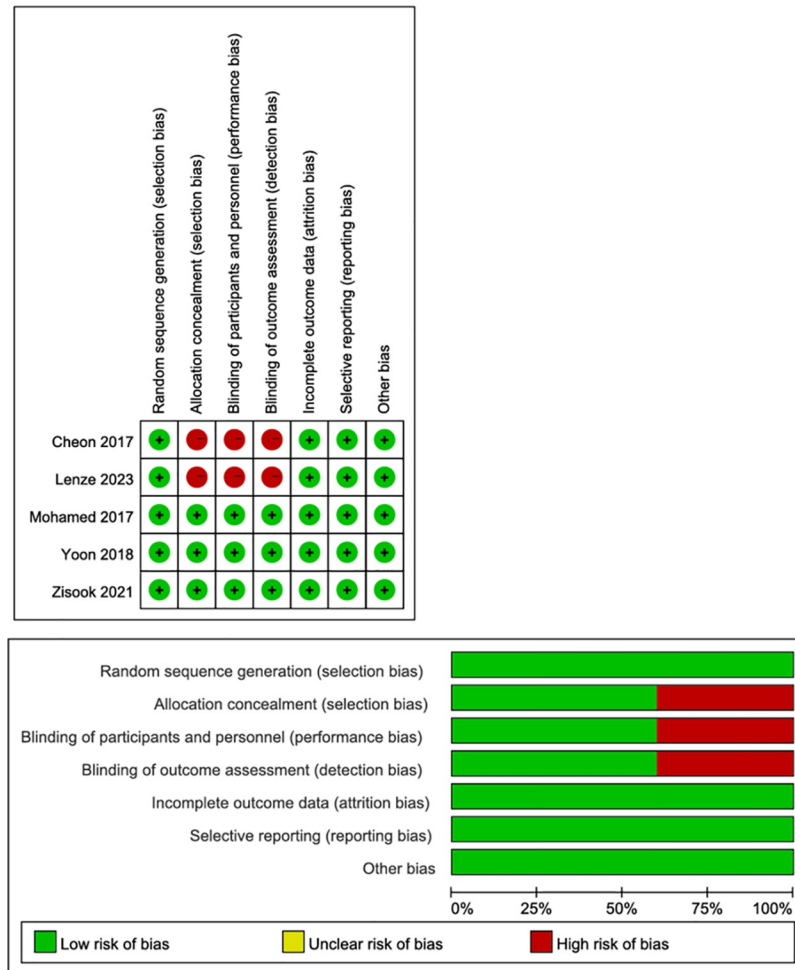

Fig 2. Details of the quality evaluation for included RCTs.

<https://doi.org/10.1371/journal.pone.0299020.g002>

Table 2. Demographics and clinical characteristics of included studies.

| Outcomes                  | WMD or RR/P-value |                    |                   |
|---------------------------|-------------------|--------------------|-------------------|
|                           | A-ARI vs A-BUP    | A-ARI vs S-BUP     | A-BUP vs S-BUP    |
| Age (years)               | -0.37/0.35        | -0.54/0.18         | -0.21/0.60        |
| Gender (male)             | 1.02/0.40         | 0.97/0.10          | <b>0.96/0.03*</b> |
| Education (year)          | 0.46/0.46         | -                  | -                 |
| Age at first onset of MDD | -1.45/0.10        | <b>-1.93/0.03*</b> | -0.50/0.57        |
| CIRS-G score              | -0.04/0.88        | -0.24/0.39         | -0.20/0.45        |
| PHQ-9                     | 0.12/0.64         | <b>0.62/0.02*</b>  | 0.51/0.05         |
| CGI-S                     | 0.03/0.46         | 0.06/0.12          | 0.04/0.28         |

\* Statistically significant.

WMD, weighted mean difference; RR, risk ratio; A-ARI, augmenting with aripiprazole; A-BUP, augmenting with bupropion; S-BUP, switching to bupropion; MDD, major depressive disorder; CIRS-G, The Cumulative Illness Rating Scale–Geriatric (CIRS-G); PHQ-9, Patient Health Questionnaire-9; CGI-S, Clinical Global Impression-Severity.

<https://doi.org/10.1371/journal.pone.0299020.t002>



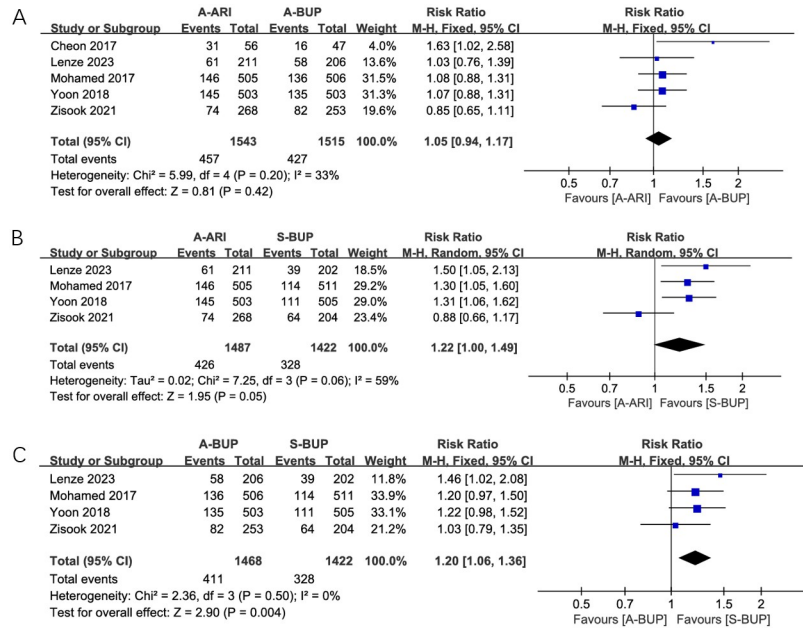

Fig 3. Forest plots of remission in (A) A-ARI vs. A-BUP, (B) A-ARI vs. S-BUP, and (C) A-BUP vs. S-BUP.

<https://doi.org/10.1371/journal.pone.0299020.g003>

0.94, 1.05;  $P = 0.87$ ), and no significant heterogeneity ( $I^2 = 0\%$ ,  $P = 0.71$ ) was observed (Fig 6B).

**A-BUP vs. S-BUP.** Adverse events data for A-BUP vs. S-BUP were synthesized from 2 RCTs, including 1474 patients (759 A-BUP versus 715 S-BUP) [12,20]. No significant difference was found between the A-BUP and S-BUP groups for adverse events (RR: 0.98; 95% CI: 0.93, 1.04;  $P = 0.61$ ), and no significant heterogeneity ( $I^2 = 0\%$ ,  $P = 0.53$ ) was observed (Fig 6C).

**Serious adverse events**

**A-ARI vs. A-BUP.** Results of serious adverse events for A-ARI vs. A-BUP were synthesized from 3 RCTs, including 1949 patients (984 A-ARI versus 965 A-BUP) [10,12,20]. No significant difference was found between the A-ARI and A-BUP group for serious adverse events (RR: 0.94; 95% CI: 0.73, 1.22;  $P = 0.65$ ), and no significant heterogeneity ( $I^2 = 0\%$ ,  $P = 0.94$ ) was observed (Fig 7A).

**A-ARI vs. S-BUP.** Data of serious adverse events for A-ARI vs. S-BUP were synthesized from 3 RCTs, including 1901 patients (984 A-ARI versus 917 S-BUP) [10,12,20]. Pooled results

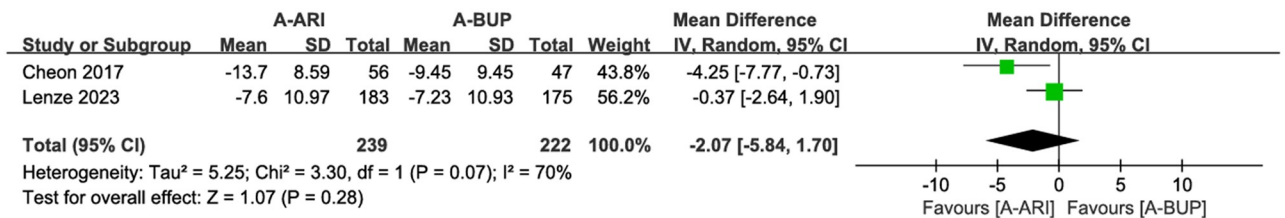

Fig 4. Forest plots of change of MADRS between the A-ARI and A-BUP.

<https://doi.org/10.1371/journal.pone.0299020.g004>

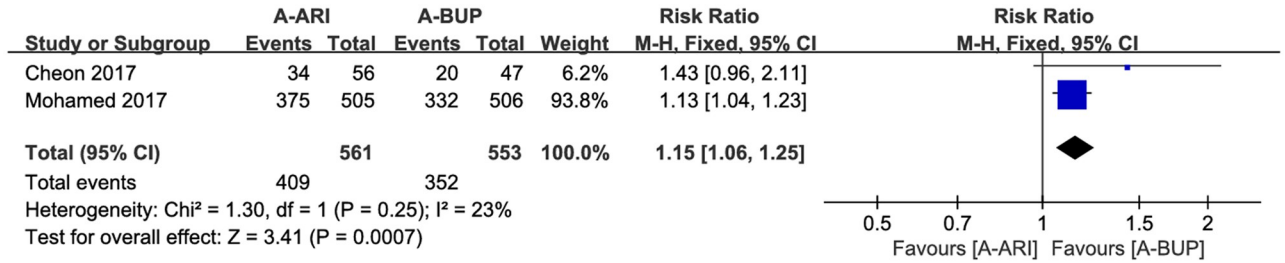

Fig 5. Forest plots of response rate between the A-ARI and A-BUP.

<https://doi.org/10.1371/journal.pone.0299020.g005>

demonstrated that the rate of serious adverse events was similar between the two groups (RR: 0.97; 95% CI: 0.75, 1.27; P = 0.85), and no significant heterogeneity (I<sup>2</sup> = 34%, P = 0.22) was observed (Fig 7B).

**A-BUP vs. S-BUP.** The study synthesized data of serious adverse events for A-BUP vs. S-BUP from 3 RCTs, including 1882 patients (995 A-BUP versus 917 S-BUP) [10,12,20]. No significant difference was found between the A-BUP and S-BUP groups for serious adverse events (RR: 1.03; 95% CI: 0.80, 1.34; P = 0.82), and no significant heterogeneity (I<sup>2</sup> = 31%, P = 0.23) was observed (Fig 7C).

### Sensitivity analysis and publication bias

We performed a sensitivity analysis for the results of adverse events of A-ARI vs. A-BUP and the remission rate of A-ARI vs. S-BUP to assess the effect of each RCT on the total WMD or RR via excluding eligible RCTs one by one. Sensitivity analysis found that the new total RR remained stable after removing each RCT for adverse events of A-ARI vs. A-BUP (Fig 8A). However, when we released the study reported by Lenze et al. [10], Mohamed

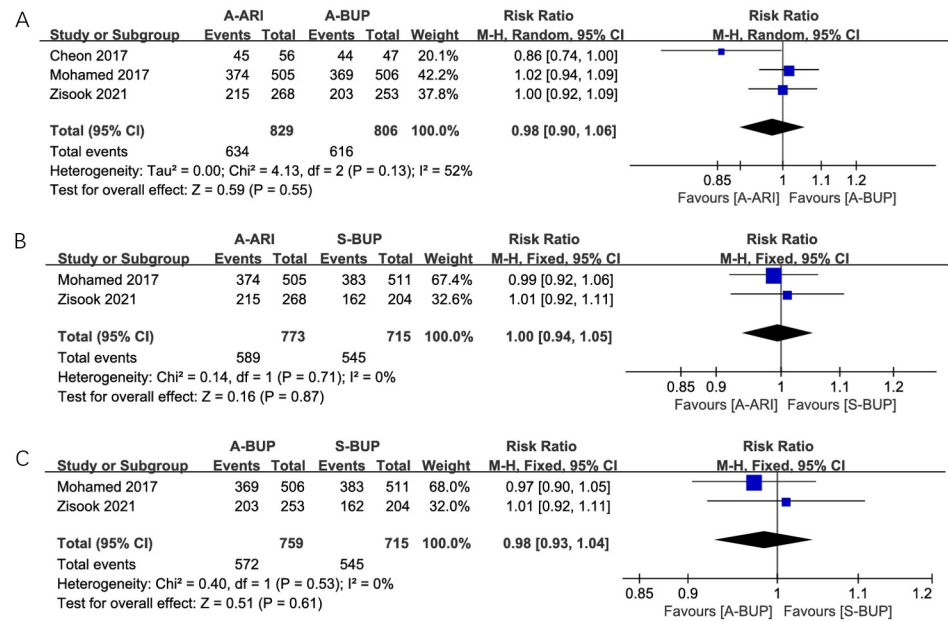

Fig 6. Forest plots of adverse events in (A) A-ARI vs. A-BUP, (B) A-ARI vs. S-BUP, and (C) A-BUP vs. S-BUP.

<https://doi.org/10.1371/journal.pone.0299020.g006>

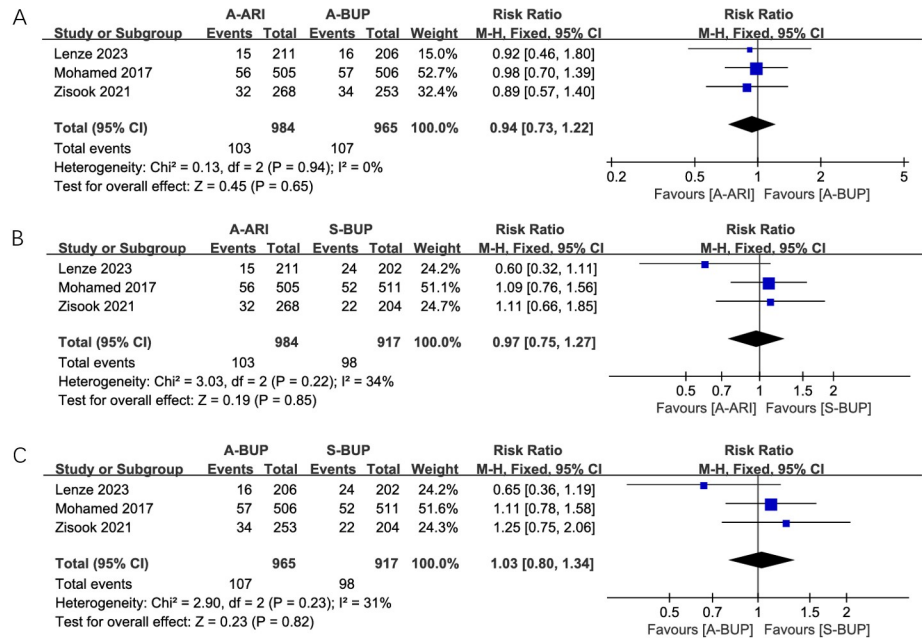

**Fig 7. Forest plots of serious adverse events in (A) A-ARI vs. A-BUP, (B) A-ARI vs. S-BUP, and (C) A-BUP vs. S-BUP).**

<https://doi.org/10.1371/journal.pone.0299020.g007>

et al. [12], or Yoon et al. [19], the pooled analysis of the remission rate of A-ARI vs. S-BUP changed from significant to nonsignificant (Fig 8B). After excluding the data reported by Cheon et al. [13], the heterogeneity of adverse events of A-ARI vs A-BUP reduced from 52% to 0%, suggesting that this paper may be the leading cause of the significant heterogeneity in the adverse events of A-ARI vs A-BUP. Besides, after excluding the data reported by Zisook et al. [20], the heterogeneity of the remission rate of A-ARI vs. S-BUP reduced from 59% to 0%, suggesting that this article may be the leading cause of the significant heterogeneity. Funnel plots revealed no considerable asymmetry was detected for all outcomes (Fig 9).

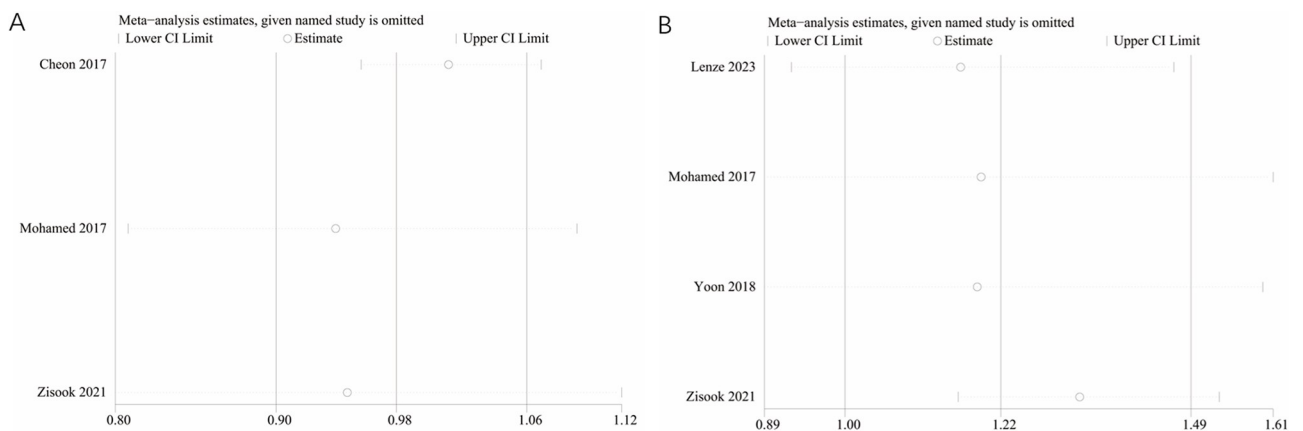

**Fig 8. Sensitivity analysis of (A) adverse events of A-ARI vs. A-BUP and (B) remission rate of A-ARI vs. S-BUP.**

<https://doi.org/10.1371/journal.pone.0299020.g008>

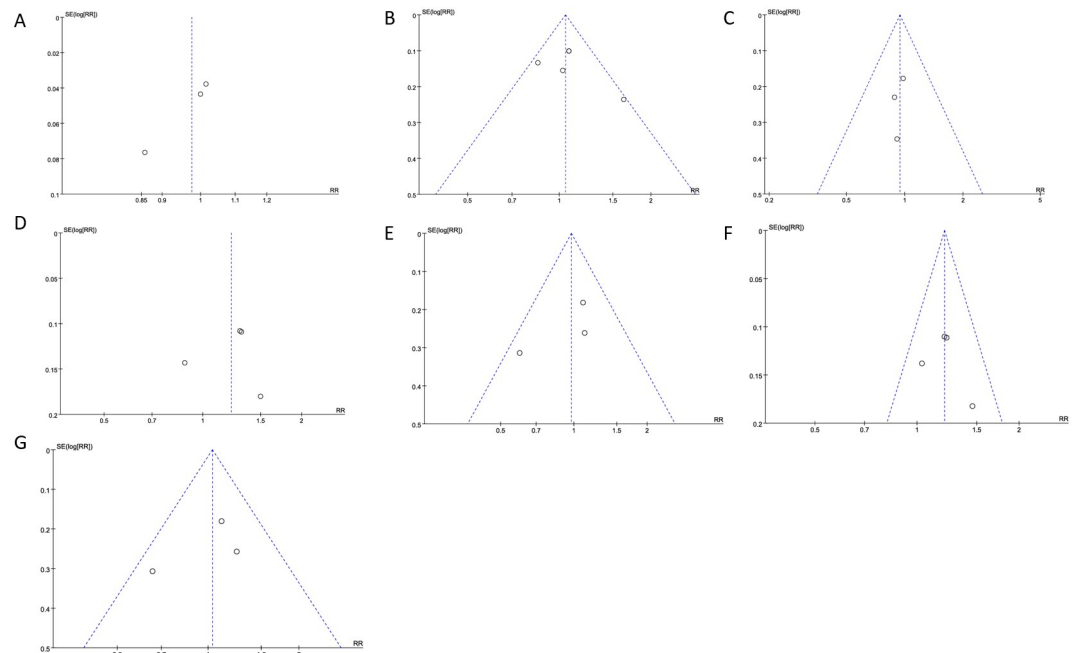

**Fig 9. Funnel plots of (A) adverse events for A-ARI vs. A-BUP, (B) remission for A-ARI vs. A-BUP, (C) serious adverse events for A-ARI vs. A-BUP, (D) remission for A-ARI vs. S-BUP, (E) serious adverse events for A-ARI vs. S-BUP, (F) remission for A-BUP vs. S-BUP, and (G) serious adverse events for A-BUP vs. S-BUP.**

<https://doi.org/10.1371/journal.pone.0299020.g009>

## Discussion

In 2015, approximately 16.1 million adults in the United States were reported to suffer from MDD [12] since less than one-third of patients reported remission on their first course of drug therapy. As a result, many patients develop TRD after undergoing multiple regimens of antidepressant therapy. The experience after several unsuccessful treatments not only brought different degrees of adverse reactions to patients but also dealt a blow to patients' confidence in treatment. It caused them double pain. Therefore, finding a treatment plan with less adverse reactions and high remission rate is urgent. Approximately 10.8 million Americans with MDD could profit from alternative treatments each year [21,22]. For these patients, a majority of clinical guidelines recommend switching or augmentation treatment with another antidepressant or a non-antidepressant [23]. The most common of these management strategies is changing to bupropion or augmentation treatment with bupropion or Aripiprazole [24]. However, which treatment is more effective and has fewer adverse effects is still unclear. This study is the first and largest systematic review and meta-analysis of randomized controlled trials (RCT) to evaluate the efficacy and safety of aripiprazole or bupropion augmentation and switching in patients with TRD or MDD. It can help provide more effective and appropriate treatment options for patients with MDD or TRD, improving their quality of life.

In this meta-analysis, we evaluated the efficacy and safety of aripiprazole or bupropion augmentation and switching in patients with TRD or MDD, and there were three key findings. First, there was no significant difference in remission rate, improvement of MADRS, adverse events, and serious adverse events between augmentation treatment with aripiprazole and augmentation treatment with bupropion. However, augmentation treatment with Aripiprazole had a significantly higher response rate than augmentation treatment with bupropion. This

result was consistent with the findings reported by Mohamed et al. in 2017 [12]. Second, augmentation treatment with Aripiprazole had a significantly higher remission rate compared with switching to bupropion.

Meanwhile, augmentation treatment with Aripiprazole and switching to bupropion have similar adverse events and serious adverse events. This finding is consistent with the results of most previous RCTs [10,12,19]. The results showed that in both TRD and MDD patients, augmentation treatment with Aripiprazole improved depression more than augmentation treatment with bupropion or switching to bupropion. The reasons for the analysis may be as follows: Different from bupropion, and Aripiprazole is an atypical antipsychotic drug which can selectively stimulate the serotonin 1A receptor and effectively block the serotonin 2A receptor. It has the effect of stabilizing dopamine and can eliminate adverse emotions such as depression. Analysis of severe events found no significant difference, confirming that augmentation treatment with Aripiprazole is more appropriate for patients with TRD or MDD.

It should be noted that a study reported by Zisook et al. [20] found that augmentation treatment with Aripiprazole and switching to bupropion have similar remission rates, which is a secondary analysis of the VAST-D trial to compare the three management strategies during the continuation phase. Third, augmentation treatment with bupropion had a significantly higher remission rate compared with switching to bupropion. Besides, augmentation treatment with bupropion and switching to bupropion have similar adverse events and serious adverse events. Therefore, they can adjust the dosage of bupropion according to the patient's condition, which can effectively improve the remission rate of depression. A two-step, open-label RCT involving elderly TRD patients aged 60 years or older reported by Lenze et al. [10] observed a similar finding. Still, several other studies found no significant difference in response rates between augmentation treatment with bupropion and switching to bupropion [12,19,20].

However, we must acknowledge several limitations of this meta-analysis. Firstly, the RCTs included in our study had different interventions (different initial and maintenance doses of antidepressants), which may be one of the sources of heterogeneity. Secondly, given none of the trials included in this meta-analysis were placebo-controlled, we could not demonstrate whether any of the three management strategies was better than no change in drug therapy. Thirdly, most of the studies included had a follow-up period of less than one year, and we could not confirm whether longer switching or augmentation treatment would have different efficacy or risks. Fourthly, only bupropion and Aripiprazole were evaluated in this meta-analysis, and the generalizability of the findings to other drugs is unclear. Finally, most of the included studies were from the USA, and whether similar findings exist in populations from other countries and regions is unknown. Despite several limitations of this meta-analysis, we conducted the first and largest meta-analysis of RCTs to evaluate the efficacy and safety of aripiprazole or bupropion augmentation and switching in patients with TRD. The results of this meta-analysis validated the superiority of the augmentation treatment with Aripiprazole for patients with TRD reported by previous studies. More large-scale, multi-center, double-anonymized RCTs are needed to confirm our findings further.

## Conclusion

Meta-analyses revealed that augmentation treatment with Aripiprazole may be a better comprehensive antidepressant treatment strategy than augmentation treatment with bupropion or switching to bupropion for patients with TRD and MDD. More large-scale, multi-centre, double-blind RCTs are needed to evaluate the efficacy and safety of aripiprazole or bupropion augmentation and switching treatment strategies further.

## Supporting information

**S1 Table. Search strategy.**

(DOCX)

**S2 Table. Analyzed data.**

(DOCX)

**S1 File. PRISMA checklist.**

(PDF)

## Author Contributions

**Conceptualization:** Mengjia Ji, Guirong Liu.

**Data curation:** Mengjia Ji, Junfei Feng, Guirong Liu.

**Formal analysis:** Mengjia Ji, Guirong Liu.

**Investigation:** Mengjia Ji, Junfei Feng, Guirong Liu.

**Methodology:** Mengjia Ji.

**Project administration:** Guirong Liu.

**Resources:** Mengjia Ji.

**Software:** Mengjia Ji, Junfei Feng.

**Supervision:** Guirong Liu.

**Validation:** Guirong Liu.

**Visualization:** Guirong Liu.

**Writing – original draft:** Mengjia Ji.

**Writing – review & editing:** Guirong Liu.

## References

1. Hamm ME, Karp JF, Lenard E, Dawdani A, Lavretsky H, Lenze EJ, et al. "What else can we do?"-Provider perspectives on treatment-resistant depression in late life. *J Am Geriatr Soc* 2022; 70(4):1190–7. <https://doi.org/10.1111/jgs.17592> PMID: 34862593
2. Mojtabai R. Diagnosing depression in older adults in primary care. *The New England journal of medicine* 2014; 370(13):1180–2. <https://doi.org/10.1056/NEJMp1311047> PMID: 24670164
3. Berlim MT, Turecki G. What is the meaning of treatment resistant/refractory major depression (TRD)? A systematic review of current randomized trials. *European neuropsychopharmacology: the journal of the European College of Neuropsychopharmacology* 2007; 17(11):696–707. <https://doi.org/10.1016/j.euroneuro.2007.03.009> PMID: 17521891
4. Diniz BS, Butters MA, Albert SM, Dew MA, Reynolds CF 3rd. Late-life depression and risk of vascular dementia and Alzheimer's disease: systematic review and meta-analysis of community-based cohort studies. *The British journal of psychiatry: the journal of mental science* 2013; 202(5):329–35. <https://doi.org/10.1192/bjp.bp.112.118307> PMID: 23637108
5. Byers AL, Yaffe K. Depression and risk of developing dementia. *Nature reviews Neurology* 2011; 7(6):323–31. <https://doi.org/10.1038/nrneurol.2011.60> PMID: 21537355
6. Ownby RL, Crocco E, Acevedo A, John V, Loewenstein D. Depression and risk for Alzheimer disease: systematic review, meta-analysis, and metaregression analysis. *Arch Gen Psychiatry* 2006; 63(5):530–8. <https://doi.org/10.1001/archpsyc.63.5.530> PMID: 16651510
7. Beekman AT, Penninx BW, Deeg DJ, de Beurs E, Geerling SW, van Tilburg W. The impact of depression on the well-being, disability and use of services in older adults: a longitudinal perspective. *Acta*

- Psychiatr Scand 2002; 105(1):20–7. <https://doi.org/10.1034/j.1600-0447.2002.10078.x> PMID: 12086221
8. Lenze EJ, Rogers JC, Martire LM, Mulsant BH, Rollman BL, Dew MA, et al. The association of late-life depression and anxiety with physical disability: a review of the literature and prospectus for future research. *The American journal of geriatric psychiatry: official journal of the American Association for Geriatric Psychiatry* 2001; 9(2):113–35. PMID: 11316616
  9. Crown WH, Finkelstein S, Berndt ER, Ling D, Poret AW, Rush AJ, et al. The impact of treatment-resistant depression on health care utilization and costs. *The Journal of clinical psychiatry* 2002; 63(11):963–71. <https://doi.org/10.4088/jcp.v63n1102> PMID: 12444808
  10. Lenze EJ, Mulsant BH, Roose SP, Lavretsky H, Reynolds CF 3rd, Blumberger DM, et al. Antidepressant Augmentation versus Switch in Treatment-Resistant Geriatric Depression. *The New England journal of medicine* 2023; 388(12):1067–79. <https://doi.org/10.1056/NEJMoa2204462> PMID: 36867173
  11. Lenze EJ, Mulsant BH, Blumberger DM, Karp JF, Newcomer JW, Anderson SJ, et al. Efficacy, safety, and tolerability of augmentation pharmacotherapy with Aripiprazole for treatment-resistant depression in late life: a randomized, double-blind, placebo-controlled trial. *Lancet (London, England)* 2015; 386(10011):2404–12. [https://doi.org/10.1016/s0140-6736\(15\)00308-6](https://doi.org/10.1016/s0140-6736(15)00308-6) PMID: 26423182
  12. Mohamed S, Johnson GR, Chen P, Hicks PB, Davis LL, Yoon J, et al. Effect of Antidepressant Switching vs Augmentation on Remission Among Patients With Major Depressive Disorder Unresponsive to Antidepressant Treatment: The VAST-D Randomized Clinical Trial. *Jama* 2017; 318(2):132–45. <https://doi.org/10.1001/jama.2017.8036> PMID: 28697253
  13. Cheon EJ, Lee KH, Park YW, Lee JH, Koo BH, Lee SJ, et al. Comparison of the Efficacy and Safety of Aripiprazole Versus Bupropion Augmentation in Patients With Major Depressive Disorder Unresponsive to Selective Serotonin Reuptake Inhibitors: A Randomized, Prospective, Open-Label Study. *Journal of clinical psychopharmacology* 2017; 37(2):193–9. <https://doi.org/10.1097/JCP.0000000000000663> PMID: 28129308
  14. Page MJ, McKenzie JE, Bossuyt PM, Boutron I, Hoffmann TC, Mulrow CD, et al. The PRISMA 2020 statement: an updated guideline for reporting systematic reviews. *BMJ (Clinical research ed)* 2021; 372:n71. <https://doi.org/10.1136/bmj.n71> PMID: 33782057
  15. Wan X, Wang W, Liu J, Tong T. Estimating the sample mean and standard deviation from the sample size, median, range and/or interquartile range. *BMC medical research methodology* 2014; 14:135. <https://doi.org/10.1186/1471-2288-14-135> PMID: 25524443
  16. Luo D, Wan X, Liu J, Tong T. Optimally estimating the sample mean from the sample size, median, mid-range, and/or mid-quartile range. *Statistical methods in medical research* 2018; 27(6):1785–805. <https://doi.org/10.1177/0962280216669183> PMID: 27683581
  17. Cumpston M, Li T, Page MJ, Chandler J, Welch VA, Higgins JP, et al. Updated guidance for trusted systematic reviews: a new edition of the Cochrane Handbook for Systematic Reviews of Interventions. *The Cochrane database of systematic reviews* 2019; 10:Ed000142. <https://doi.org/10.1002/14651858.ED000142> PMID: 31643080
  18. Higgins JP, Thompson SG. Quantifying heterogeneity in a meta-analysis. *Statistics in medicine* 2002; 21(11):1539–58. <https://doi.org/10.1002/sim.1186> PMID: 12111919
  19. Yoon J, Zisook S, Park A, Johnson GR, Scrymgeour A, Mohamed S. Comparing Cost-Effectiveness of Aripiprazole Augmentation With Other "Next-Step" Depression Treatment Strategies: A Randomized Clinical Trial. *The Journal of clinical psychiatry* 2018; 80(1). <https://doi.org/10.4088/JCP.18m12294> PMID: 30695291
  20. Zisook S, Johnson GR, Hicks P, Chen P, Beresford T, Michalets JP, et al. Continuation phase treatment outcomes for switching, combining, or augmenting strategies for treatment-resistant major depressive disorder: A VAST-D report. *Depression and anxiety* 2021; 38(2):185–95. <https://doi.org/10.1002/da.23114> PMID: 33225492
  21. Kolovos S, van Tulder MW, Cuijpers P, Prigent A, Chevreur K, Riper H, et al. The effect of treatment as usual on major depressive disorder: A meta-analysis. *Journal of affective disorders* 2017; 210:72–81. <https://doi.org/10.1016/j.jad.2016.12.013> PMID: 28013125
  22. Cleare A, Pariante CM, Young AH, Anderson IM, Christmas D, Cowen PJ, et al. Evidence-based guidelines for treating depressive disorders with antidepressants: A revision of the 2008 British Association for Psychopharmacology guidelines. *Journal of psychopharmacology (Oxford, England)* 2015; 29(5):459–525. <https://doi.org/10.1177/0269881115581093> PMID: 25969470
  23. Kennedy SH, Lam RW, McIntyre RS, Tourjman SV, Bhat V, Blier P, et al. Canadian Network for Mood and Anxiety Treatments (CANMAT) 2016 Clinical Guidelines for the Management of Adults with Major Depressive Disorder: Section 3. Pharmacological Treatments. *Canadian journal of psychiatry Revue*

canadienne de psychiatrie 2016; 61(9):540–60. <https://doi.org/10.1177/0706743716659417> PMID: 27486148

24. Goldberg JF, Freeman MP, Balon R, Citrome L, Thase ME, Kane JM, et al. THE AMERICAN SOCIETY OF CLINICAL PSYCHOPHARMACOLOGY SURVEY OF PSYCHOPHARMACOLOGISTS' PRACTICE PATTERNS FOR THE TREATMENT OF MOOD DISORDERS. *Depression and anxiety* 2015; 32(8):605–13. <https://doi.org/10.1002/da.22378> PMID: 26129956
